# Supplementary material
Source: PubMed Central journal article supplement (PMC4248995)
Supplement: AEM.02287-14_zam999105788so1.pdf [file AEM.02287-14_zam999105788so1.pdf]

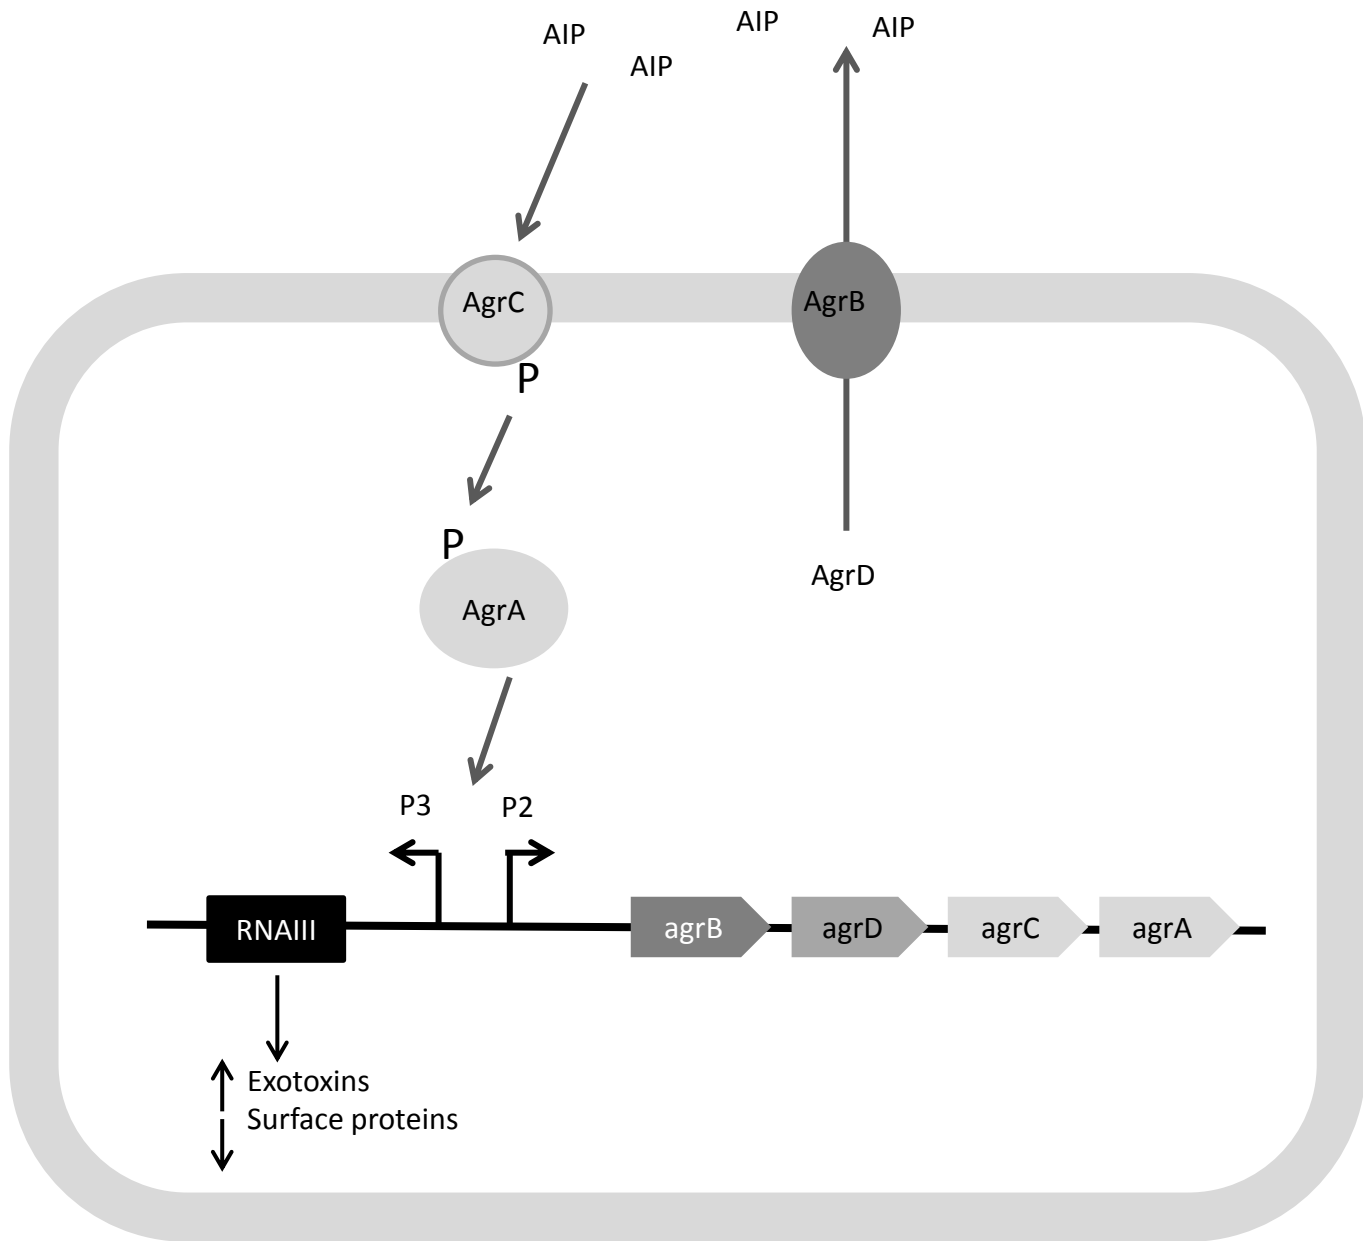

**Figure S1.** The *agr* system.

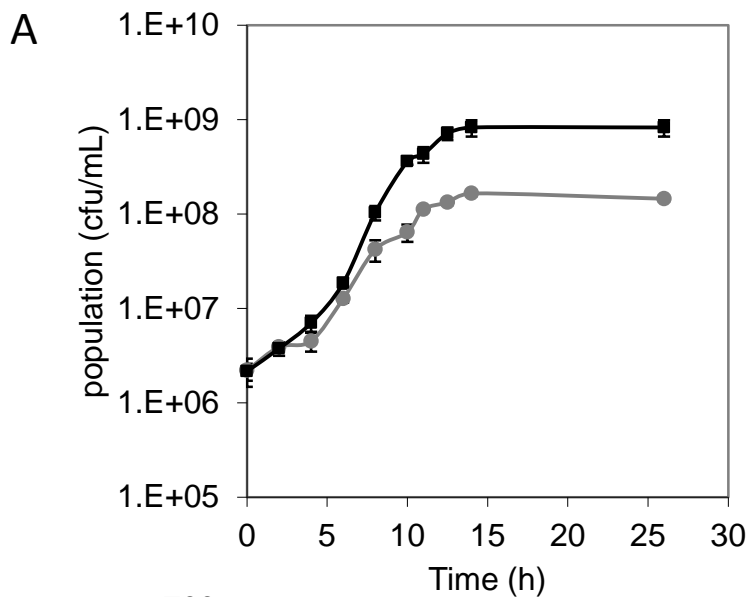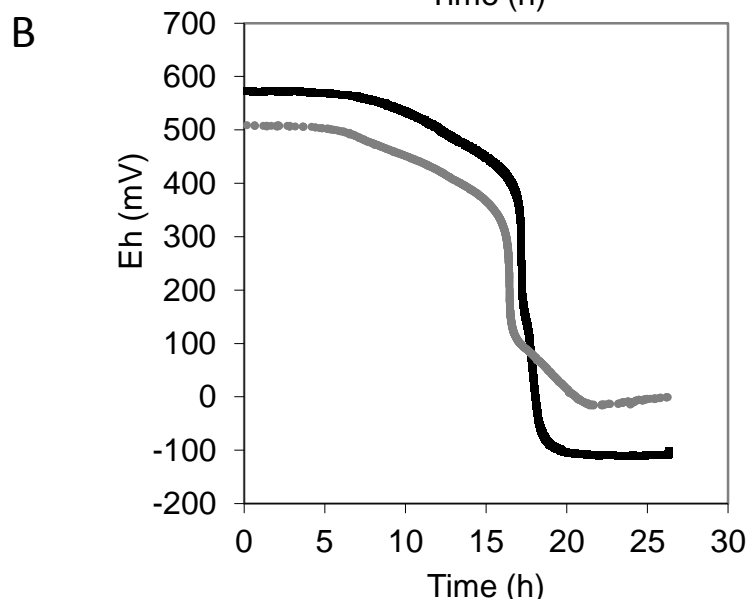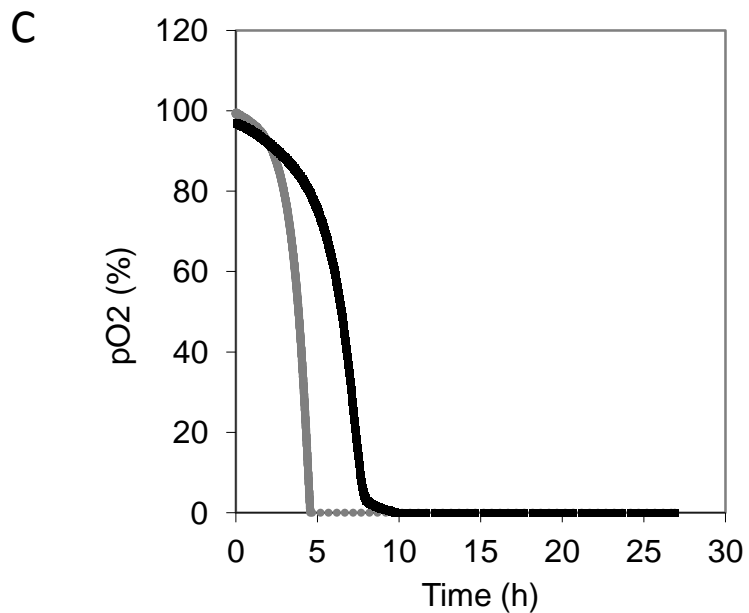

**Figure S2.** Kinetics of *S. aureus* growth (A), redox potential (Eh) (B) and partial oxygen pressure (pO<sub>2</sub>) (C) during cultures of *S. aureus* MW2 alone (black squares) or in mixed cultures with *L. lactis* LD61 (grey circles), under the reference conditions with the addition of potassium ferricyanide.

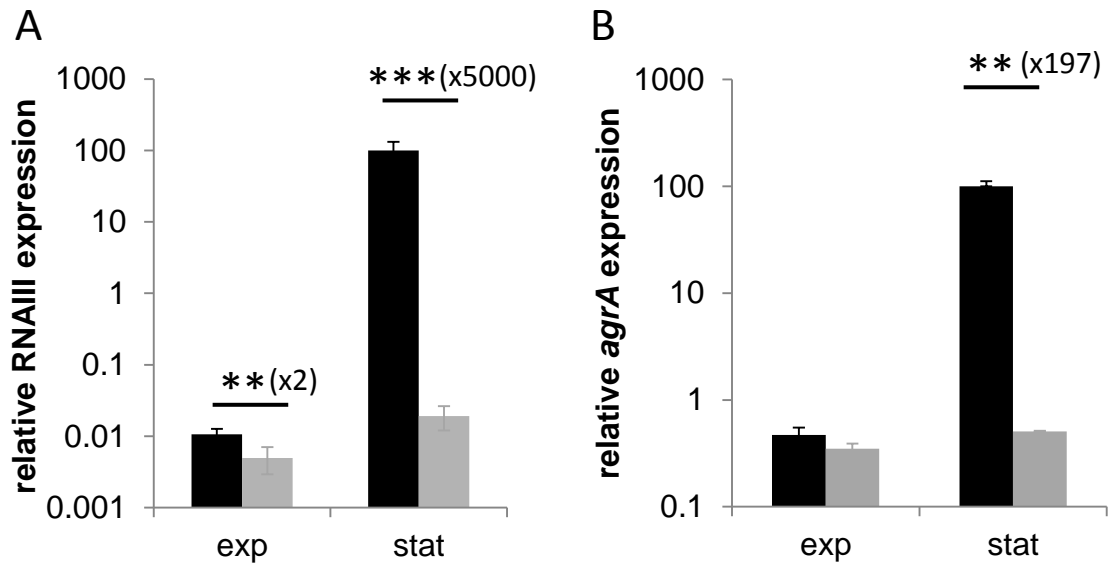

**Figure S3.** Expressions of RNAIII and *agrA* in *S. aureus* MW2 *srrA* in pure culture (black) and mixed culture with *L. lactis* LD61 (grey) under the reference conditions. The expressions of RNAIII (A) and *agrA* (B) were determined by qRT-PCR during exponential (exp), and stationary (stat) phases of growth and were expressed relative to those of RNAIII and *agrA* in the stationary phase in pure culture (100%), respectively. Significant changes of expression in pure vs. mixed cultures were determined for each time point using one-way analysis of variance, and are indicated by asterisks. \*\*: P<0.01; \*\*\*: P<0.001.

**Table S1.** List of primers used in the study

| Primer name             | Sequence (5'→3') <sup>a</sup>                                  | Comments                                             |
|-------------------------|----------------------------------------------------------------|------------------------------------------------------|
| BoxA2-srrAB-F-<br>BamH1 | GGAGGATCCGAAGTGAAAGCCCTAG<br>AAAAAGGT                          | Amplification of<br>BoxA2 in <i>S. aureus</i><br>MW2 |
| BoxA2-srrAB-R-<br>XhoI  | ATCAGCAAGTACGCGATGTGCTCGAG<br><b>CTATTGGCCATTACTTGCTTCATGG</b> | Amplification of<br>BoxA2 in <i>S. aureus</i><br>MW2 |
| BoxB2-srrAB-F-<br>XhoI  | CCATGAAGCAAGTAATGGCCAATAG<br><u>CTCGAGCACATCGCGTACTTGCTGAT</u> | Amplification of<br>BoxB2 in <i>S. aureus</i><br>MW2 |
| BoxB2-srrAB-R-<br>BglII | AGA <u>AGATCTTCATCA</u> ACCCACCAGGA<br>TTT                     | Amplification of<br>BoxB2 in <i>S. aureus</i><br>MW2 |
| srrAB-up                | AGACGATGAAGAAATGGATGCT                                         | Validation of <i>srrA</i><br>deletion                |
| srrAB-down              | GTACCTTGTTTACCTCGCGTTC                                         | Validation of <i>srrA</i><br>deletion                |

<sup>a</sup> restriction sites are underlined. Position of the stop codon inserted in the *srrA* sequence is indicated in bold.
